# Supplementary material
Source: publisher figshare collection journal article supplement (https://aacr.figshare.com/articles/dataset/_/22367097)

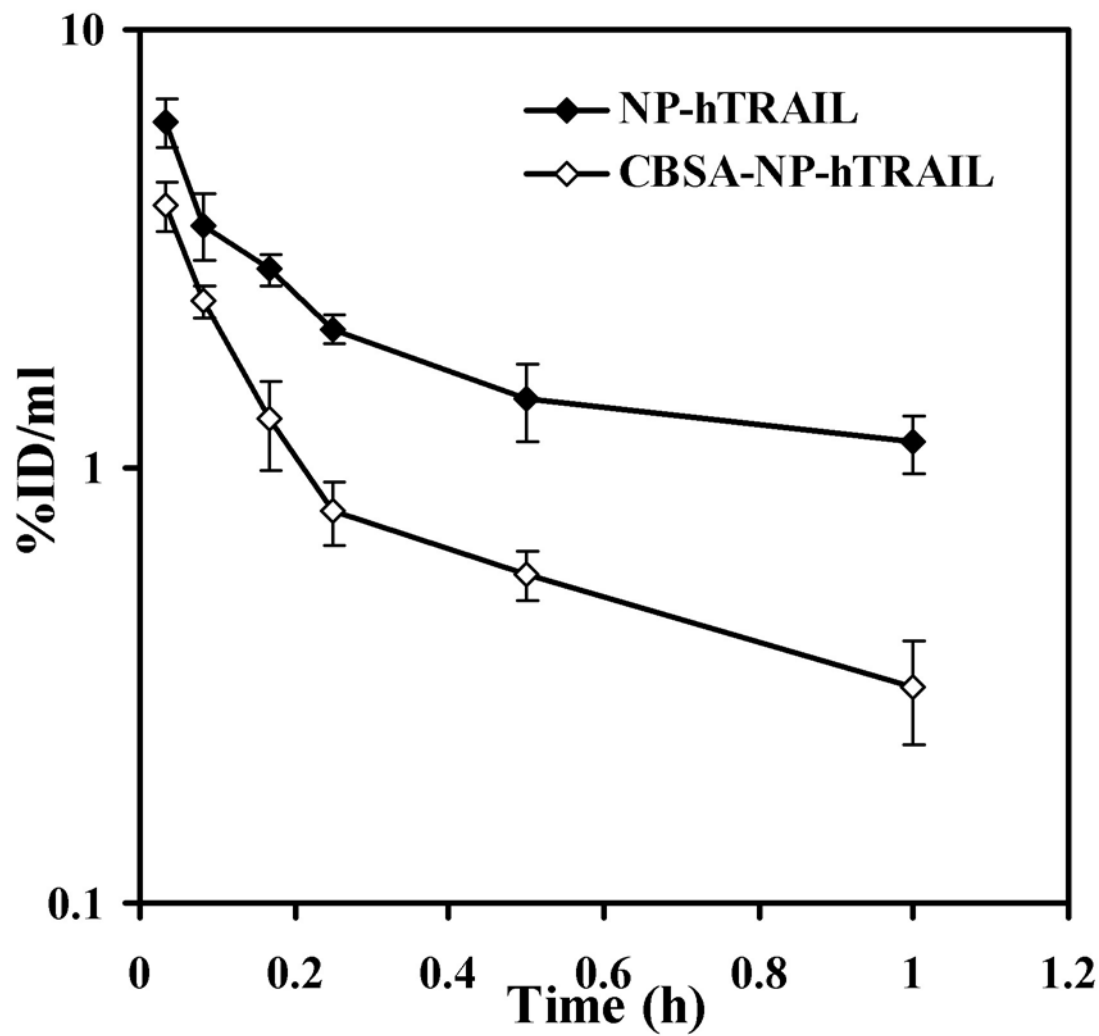

Wei LU, Supplemental Fig.

Supplement: Supplementary file 1 [file 39812154]
